# Supplementary material for: Model of Early Diagenesis in the Upper Sediment with Adaptable complexity – MEDUSA (v. 2): a time-dependent biogeochemical sediment module for Earth system models, process analysis and teaching
Source: Copernicus journal article supplement (doi:10.5194/gmd-14-3603-2021), 2021-06-15
Supplement: Supplementary file 1 [file gmd-14-3603-2021-supplement.zip › gmd-14-3603-2021-supplement-title-page.pdf]

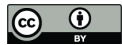

*Supplement of*

## **Model of Early Diagenesis in the Upper Sediment with Adaptable complexity – MEDUSA (v. 2): a time-dependent biogeochemical sediment module for Earth system models, process analysis and teaching**

**Guy Munhoven**

*Correspondence to:* Guy Munhoven (guy.munhoven@uliege.be)

- gmd-14-3603-2021-supplement-title-page.pdf
- additionalresults.pdf
- buildandrun.pdf
- coupling-guidelines.pdf
- diagengen.pdf
- jeasim\_defs.pdf
- medmbm.pdf
- medusa-cocogen.pdf
- medusa-frameworksystem.pdf
- medusa\_v2.tar.gz
- medusatechref.pdf
- readme.txt
- smcontents.pdf

The copyright of individual parts of the supplement might differ from the article licence.
