# Supplementary material for: Model of Early Diagenesis in the Upper Sediment with Adaptable complexity – MEDUSA (v. 2): a time-dependent biogeochemical sediment module for Earth system models, process analysis and teaching
Source: Copernicus journal article supplement (doi:10.5194/gmd-14-3603-2021), 2021-06-15
Supplement: Supplementary file 1 [file gmd-14-3603-2021-supplement.zip › readme.txt]

This archive contains Supplementary Material to the paper
"G. Munhoven. Model of Early Diagenesis in the Upper Sediment with
 Adaptable complexity -- MEDUSA (v.2): a time-dependent biogeochemical
 sediment module for Earth System Models, process analysis and teaching.
 Geoscientific Model Development, 2021."


Please refer to smcontents.pdf for more information about the contents.


Notice:

medusa_v2.tar.gz extracts its contents by default into the working directory.
